# Supplementary material for: Enhanced nitrite accumulation under mainstream conditions by a combination of free ammonia-based sludge treatment and low dissolved oxygen: reactor performance and microbiome analysis
Source: PubMed Central journal article supplement — RSC Adv. 2020 Jan 10;10(4):2049–59. doi: 10.1039/c9ra07628j (PMC9048193; doi:10.1039/c9ra07628j), 2020-01-10
Supplement: RA-010-C9RA07628J-s001.pdf [file RA-010-C9RA07628J-s001.pdf]

**Enhanced nitrite accumulation at mainstream conditions by a combination of free ammonia-based sludge treatment and low dissolved oxygen: reactor performance and microbiome analysis**

Heng Yu<sup>a</sup>, Zhiyong Tian<sup>b</sup>, Jane Zuo<sup>a\*</sup>, Yonghui Song<sup>b,\*\*</sup>

<sup>a</sup>*State Key Joint Laboratory of Environment Simulation and Pollution Control, School of Environment, Tsinghua University, Beijing 100084, China*

<sup>b</sup>*State Key Laboratory of Environmental Criteria and Risk Assessment, Chinese Research Academy of Environmental Sciences, Beijing 100012, China*

Heng Yu, E-mail: [h-yu@mail.tsinghua.edu.cn](mailto:h-yu@mail.tsinghua.edu.cn) Fax: +86-10-84917906 Tel: +86-10-84914787

Address: School of Environment, Tsinghua University, Beijing 100084, China

Zhiyong Tian, E-mail: [Hkytzy2008@163.com](mailto:Hkytzy2008@163.com) Fax: +86-10-84917906 Tel: +86-10-84914787

Address: Department of Urban Water Environmental Research, Chinese Research Academy of Environmental Sciences, Beijing 100012, China

Jiane Zuo, E-mail: [jjane.zuo@tsinghua.edu.cn](mailto:jjane.zuo@tsinghua.edu.cn) Fax: +86-10-62784521 Tel: +86-10-62772455

Address: School of Environment, Tsinghua University, Beijing 100084, China

Yonghui Song, E-mail: [songyh@craes.org.cn](mailto:songyh@craes.org.cn) Fax: +86-10-84915194 Tel: +86-010-84915308

Address: Chinese Research Academy of Environmental Sciences, Beijing 100012, China

---

\* Corresponding author. Tel: +86-10-62772455. E-mail: [jjane.zuo@tsinghua.edu.cn](mailto:jjane.zuo@tsinghua.edu.cn)

\*\* Additional corresponding author. Tel: 86-010-84915308. E-mail: [songyh@craes.org.cn](mailto:songyh@craes.org.cn)

Table S1. Primers description used in this study

| Target                            | primer         | Sequence (5'-3')               | reference |
|-----------------------------------|----------------|--------------------------------|-----------|
| <b>qPCR</b>                       |                |                                |           |
| Bacteria                          | 1055F          | 5'-ATGGCTGTCGTCAGCT-3'         | 1         |
|                                   | 1392R          | 5'-ACGGGCGGTGTGTAC-3'          |           |
| AOB                               | CTO189f<br>A/B | 5'-GGAGRAAAGCAGGGGATCG-3'      | 2         |
|                                   | CTO189fC       | 5'-GGAGGAAAGTAGGGGATCG-3'      |           |
| <i>Nitrobacter</i>                | RT1r           | 5'-CGTCCTCTCAGACCARCT-3'       | 3         |
|                                   | Nitro-1198f    | 5'-CCCCTAGCAAATCTCAAAAAACCG-3' |           |
| <i>Nitrospira</i>                 | Nitro-1423R    | 5'-CTTCACCCCAGTCGCTGACC-3'     | 4         |
|                                   | NSR-1113f      | 5'-CCTGCTTTCAGTTGCTACCG-3'     |           |
|                                   | NSR-1264R      | 5'-GTTTGCAGCGCTTGTACCG-3'      |           |
| <b>High throughput sequencing</b> |                |                                |           |
| Bacteria                          | 341F           | 5'-CCTACGGGNGGCWGCAG-3'        | 5         |
|                                   | 805R           | 5'-GACTACHVGGGTATCTAATCC-3'    |           |

Table 2S.  $\alpha$ -diversity index of bacterial communities among all biomass samples from the experimental reactor and the control reactor for clustering at 97% identity

| Sample ID   | OTUs | Shannon  | ACE        | Chao1      | Coverage | Simpson  |
|-------------|------|----------|------------|------------|----------|----------|
| Seed sludge | 316  | 2.974923 | 381.758273 | 393        | 0.998591 | 0.107252 |
| C1          | 441  | 3.134701 | 557.816206 | 545.590909 | 0.99752  | 0.105    |
| E1          | 519  | 3.722303 | 675.26718  | 724.909091 | 0.997029 | 0.051988 |
| C2          | 595  | 4.065057 | 750.081716 | 750.012658 | 0.996969 | 0.037005 |
| E2          | 626  | 3.985393 | 844.629792 | 855.4      | 0.99695  | 0.048427 |
| C3          | 706  | 4.226328 | 848.782354 | 860.011111 | 0.997177 | 0.037181 |
| E3          | 559  | 4.102786 | 732.909647 | 737.888889 | 0.995169 | 0.034825 |
| C4          | 563  | 3.78523  | 751.542229 | 746.825    | 0.996286 | 0.051295 |
| E4          | 599  | 3.745925 | 839.328063 | 827.735632 | 0.995784 | 0.051911 |
| C5          | 509  | 3.445929 | 664.670992 | 664.208333 | 0.997481 | 0.069149 |
| E5          | 542  | 3.342467 | 725.636759 | 684.738636 | 0.997218 | 0.095371 |

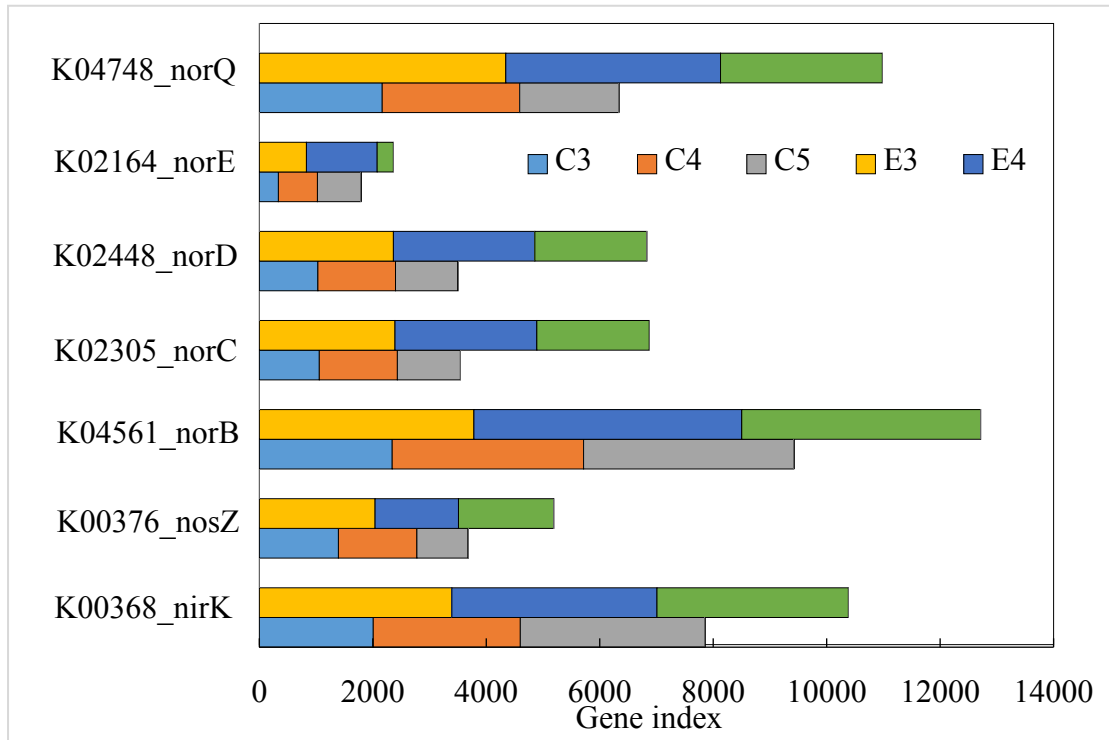

Fig. S1. Key genes involved in denitrification by PICRUSt prediction.

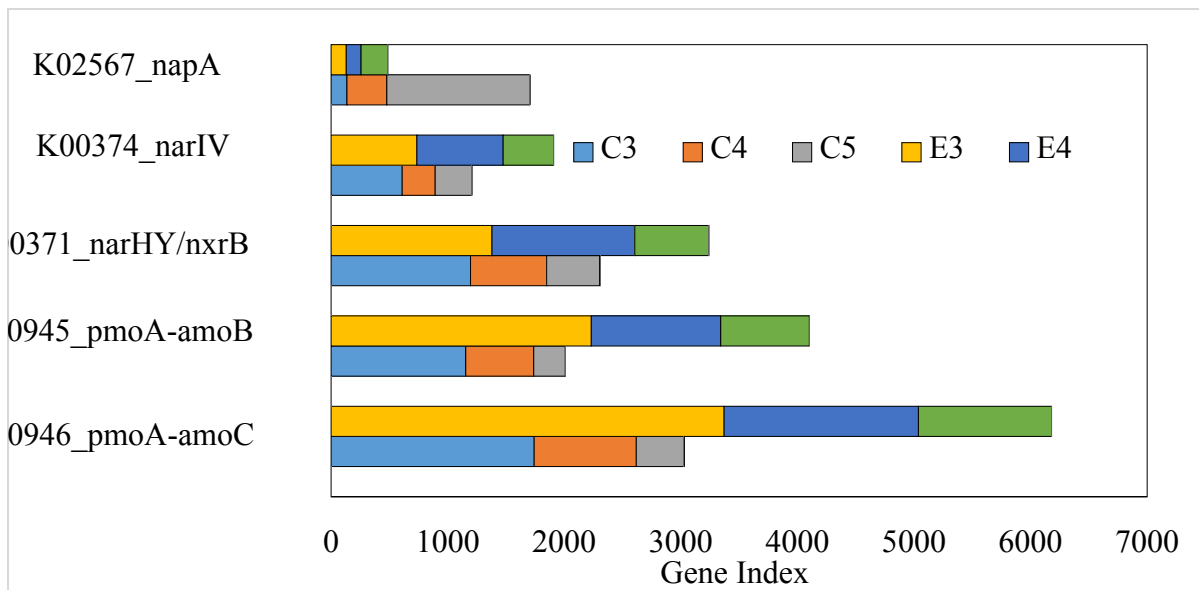

Fig. S2. Similar functional genes involved in nitrification by PICRUSt prediction.

### Reference

1. M. J. Ferris, G. Muyzer and D. M. Ward, *Appl. Environ. Microbiol.*, 1996, **62**, 340-346.
2. G. A. Kowalchuk, J. R. Stephen, W. De Boer, J. I. Prosser, T. M. Embley and J.

- W. Woldendorp, *Appl. Environ. Microbiol.*, 1997, **63**, 1489-1497.
3. D. W. Graham, C. W. Knapp, E. S. Van Vleck, K. Bloor, T. B. Lane and C. E. Graham, *The ISME Journal*, 2007, **1**, 385-393.
  4. H. M. Dionisi, A. C. Layton, G. Harms, I. R. Gregory, K. G. Robinson and G. S. Sayler, *Appl. Environ. Microbiol.*, 2002, **68**, 245-253.
  5. Y. IchYu, C. Lee, J. Kim and S. Hwang, *Biotechnol. Bioeng.*, 2005, **89**, 670-679.
